# Supplementary material for: Inducible Defenses with a "Twist": Daphnia barbata Abandons Bilateral Symmetry in Response to an Ancient Predator
Source: PLoS One. 2016 Feb 17;11(2):e0148556. doi: 10.1371/journal.pone.0148556 (PMC4757099; doi:10.1371/journal.pone.0148556)
Supplement: S1 Dataset — (XLSX) [file pone.0148556.s001.xlsx]

## Sheet: Raw Data
Treatment	Replicate #	Torsion Tail Spine [µm]	Torsion Helmet [µm]	Body Torsion [µm]
Induced	1	277	57	334
Induced	1	222	44	266
Induced	1	146	46	192
Induced	1	310	36	346
Induced	1	159	70	229
Induced	1	296	39	335
Induced	1	138	74	212
Induced	2	158	80	238
Induced	2	251	100	351
Induced	2	193	157	350
Induced	2	346	86	432
Induced	2	248	55	303
Induced	2	497	26	523
Induced	3	308	111	419
Induced	3	203	109	312
Induced	3	311	58	369
Induced	3	458	16	474
Induced	3	312	124	436
Induced	3	388	95	483
Induced	3	170	106	276
Induced	3	412	61	473
Induced	3	266	109	375
Induced	4	275	96	371
Induced	4	311	18	329
Induced	6	140	121	261
Induced	6	209	119	328
Induced	6	244	56	300
Induced	7	332	84	416
Induced	7	293	48	341
Induced	7	299	122	421
Induced	7	299	119	418
Induced	7	396	101	497
Induced	8	248	106	354
Induced	8	229	53	282
Induced	8	277	106	383
Induced	8	252	135	387
Induced	9	219	75	294
Induced	9	242	58	300
Induced	10	213	81	294
Induced	10	338	25	363
Induced	11	380	39	419
Induced	11	258	82	340
Induced	11	201	81	282
Induced	11	260	78	338
Induced	12	456	52	508
Induced	12	433	94	527
Induced	12	247	93	340
Induced	12	313	13	326
Induced	12	316	115	431
Induced	13	228	161	389
Induced	13	265	147	412
Induced	13	93	139	232
Induced	13	252	68	320
Induced	13	303	30	333
Induced	13	250	107	357
Induced	13	175	129	304
Induced	13	239	156	395
Induced	14	42	17	59
Induced	14	169	128	297
Induced	14	321	94	415
Induced	14	226	65	291
Induced	14	256	21	277
Induced	16	185	77	262
Induced	16	313	42	355
Induced	16	277	111	388
Control	17	23	6	29
Control	17	103	3	106
Control	17	96	0	96
Control	17	8	11	19
Control	17	38	3	41
Control	19	42	15	57
Control	19	61	25	86
Control	21	105	49	154
Control	21	81	39	120
Control	21	67	18	85
Control	21	8	25	33
Control	22	0	28	28
Control	22	43	0	43
Control	24	28	30	58
Control	23	16	16	32
Control	23	35	1	36
Control	23	35	17	52
Control	23	84	18	102
Control	23	11	5	16
Control	23	36	23	59
Control	25	51	10	61
Control	25	146	47	193
Control	25	27	16	43
Control	25	0	6	6
Control	26	27	16	43
Control	26	11	5	16
Control	27	20	6	26
Control	27	69	7	76
Control	27	6	46	52
Control	27	34	4	38
Control	28	129	44	173
Control	28	97	54	151
Control	28	39	7	46
Control	28	44	29	73

## Sheet: Replicate Means
Treatment	Replicate #	Torsion Tail Spine [µm]	Torsion Helmet [µm]	Body Torsion [µm]
Control	17	53.6	4.6	58.2
Control	19	51.5	20	71.5
Control	21	65.25	32.75	98
Control	22	21.5	14	35.5
Control	23	36.17	13.33	49.5
Control	24	28	30	58
Control	25	56	19.75	75.75
Control	26	19	10.5	29.5
Control	27	32.25	15.75	48
Control	28	77.25	33.5	110.75
Induced	1	221.14	52.29	273.43
Induced	2	282.17	84	366.17
Induced	3	314.22	87.67	401.89
Induced	4	293	57	350
Induced	6	197.67	98.67	296.33
Induced	7	323.8	94.8	418.6
Induced	8	251.5	100	351.5
Induced	9	230.5	66.5	297
Induced	10	275.5	53	328.5
Induced	11	274.75	70	344.75
Induced	12	353	73.4	426.4
Induced	13	225.62	117.13	342.75
Induced	14	202.8	65	267.8
Induced	16	258.33	76.67	335
